# Supplementary material for: The bromodomain protein TRIM28 controls the balance between growth and invasiveness in melanoma
Source: PubMed Central journal article supplement (PMC9827549; doi:10.15252/embr.202254944), 2022-11-07
Supplement: EMBR-24-e54944-s002.pdf [file EMBR-24-e54944-s002.pdf]

## Expanded View Figures

### Figure EV1. TRIM28 is associated with poor survival, increased expression of metastatic gene signatures, and the invasiveness of melanoma cells.

- A Univariate Cox regression analysis of bromodomain gene expression and overall survival in metastatic melanoma. SKCM data (TCGA) were analyzed for bromodomain gene expression in metastases ( $n = 367$ ) and the overall survival of corresponding patients.
- B Validation of TRIM28 knockdown using immunoblotting on cell lysates from A375 cells transduced with shLUC, shSCR, shT28-1, or shT28-2 lentiviruses.
- C Densitometry (relative to  $\beta$ -actin) of the immunoblot in (B).
- D GSEA of gene signatures associated with metastasis of melanoma to distant organs (KAUFFMANN\_MELANOMA\_RELAPSE\_UP or WINNEPENNINCKX\_MELANOMA\_METASTASIS\_UP) in metastases ( $n = 367$ ; *left*) with high (T28hi) or low (T28lo) TRIM28 expression, and in A375 cells (*right*) transduced with two shNTC (shSCR and shLUC) or shT28-1 and shT28-2 ( $n = 3$  per construct). RNA-seq data from melanoma metastases were downloaded from The Cancer Genome Atlas (TCGA).
- E Eight-week-old female nude mice were injected subcutaneously with  $2.5 \times 10^6$  A375 cells transduced with shSCR or shT28-3 lentivirus. Tumor size was measured every 3<sup>rd</sup> day and tumor size was calculated using the formula  $V = (L \times W \times W)/2$  ( $n = 10$  mice per group). Results are expressed as mean  $\pm$  SEM. Statistics were calculated using repeated measures ANOVA.
- F Tumor weight analyzed 17 days after subcutaneous injection of cells transduced with shSCR or shT28-3 lentivirus ( $n = 10$  mice per group). Results are expressed as mean  $\pm$  SEM. Statistics were calculated using the two-sided Mann–Whitney *U*-test.
- G Eight-week-old female C57BL6/J were injected subcutaneously with  $1 \times 10^5$  B16.F10 cells transduced with LKO.1 lentivirus targeting Firefly luciferase (shLuc;  $n = 5$ ) or Trim28 (shT28;  $n = 4$ ). Tumor weight was measured after 14 days, and statistics were calculated using the two-sided Mann–Whitney *U*-test. Results are expressed as mean  $\pm$  SEM.
- H Validation of TRIM28 knockdown in A375 cells using shT28-3 (top panel) and in B16.F10 using an shRNA specific for mouse *Trim28* (bottom panel).
- I Reduced expression of the YAP1 target genes *CTGF* and *CYR61* in A375-MA2 cells after TRIM28 knockdown. One-way ANOVA and Dunnett's *post hoc* test were used for statistical testing.

Data information: *P*-values in (E, F, G, and I): \**P* < 0.05, \*\**P* < 0.01, \*\*\**P* < 0.001.

Source data are available online for this figure.

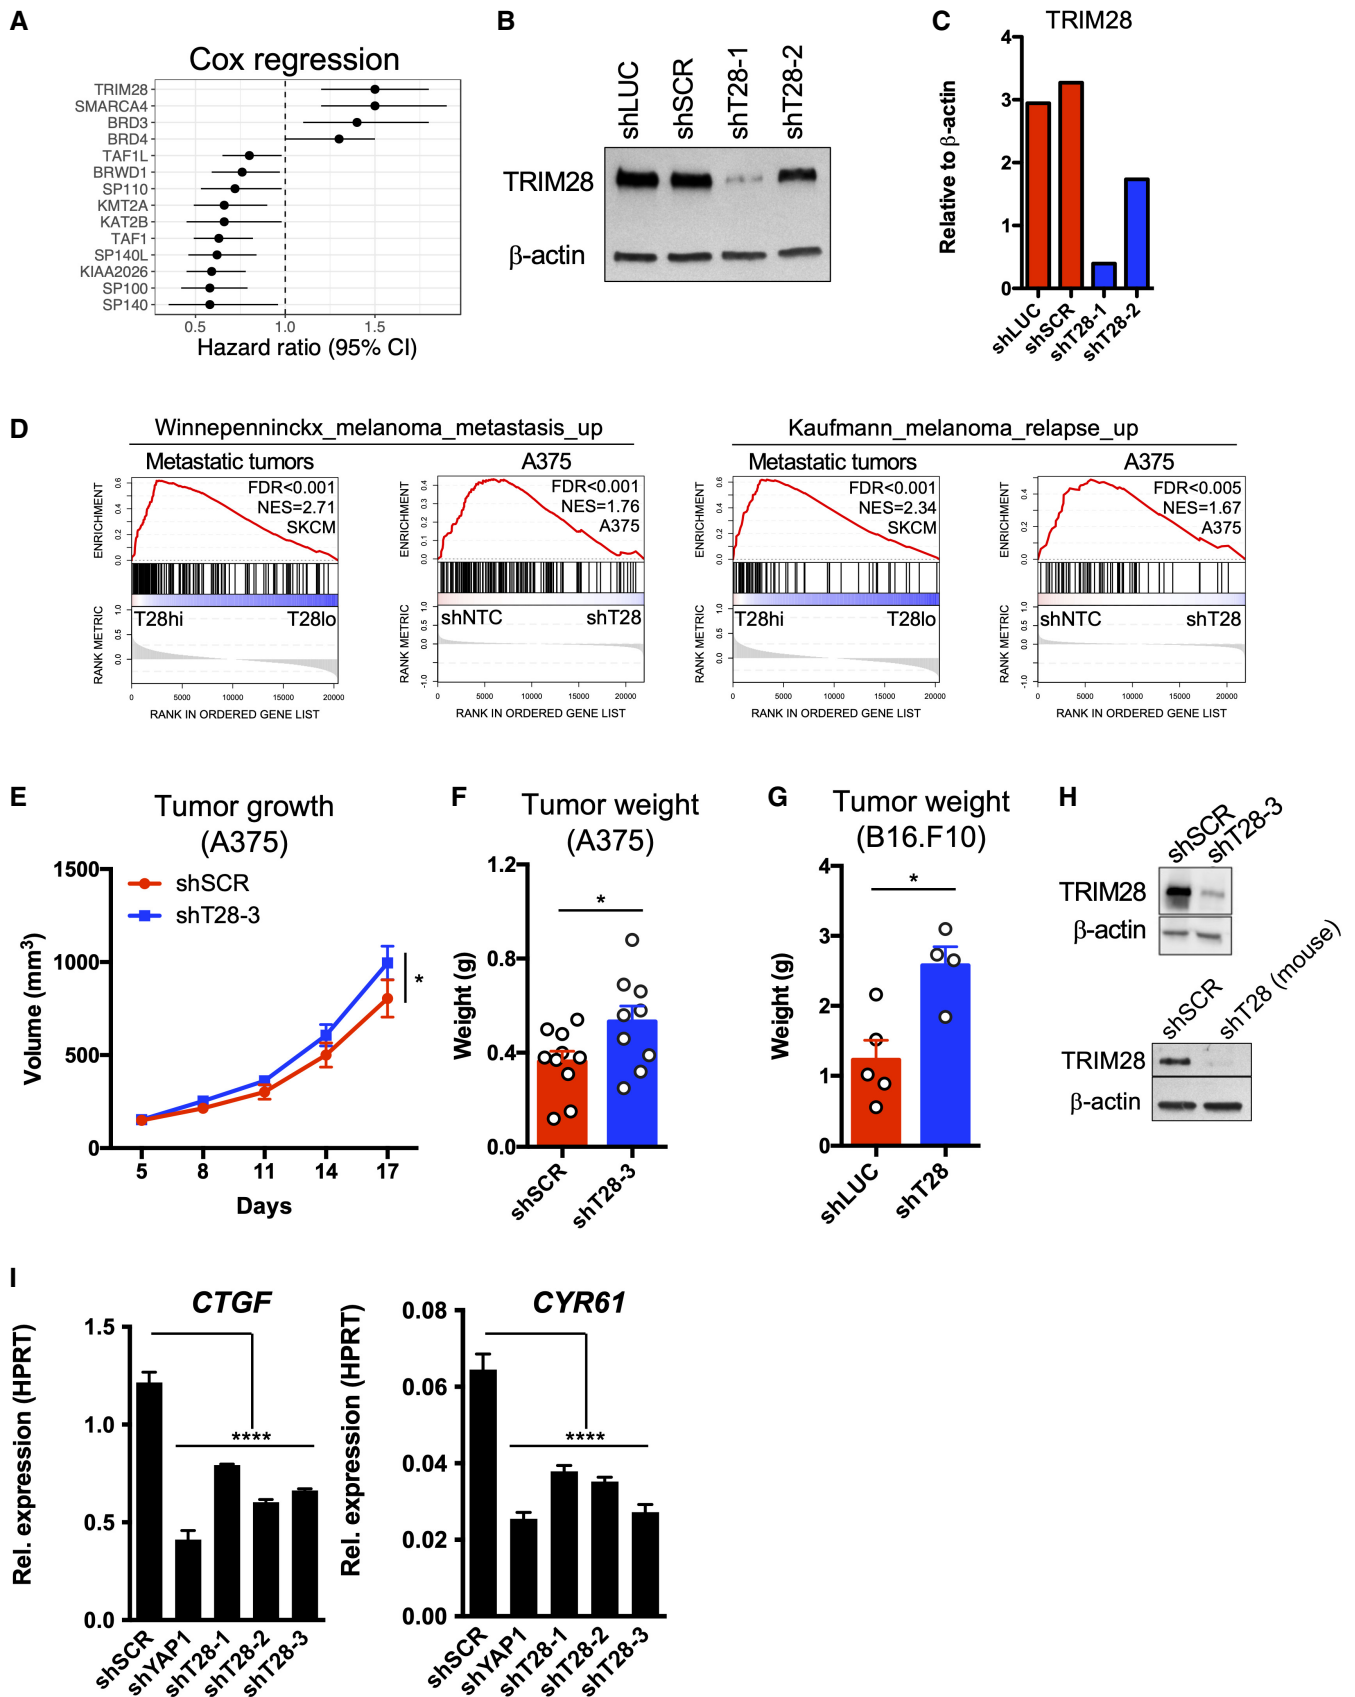

Figure EV1.

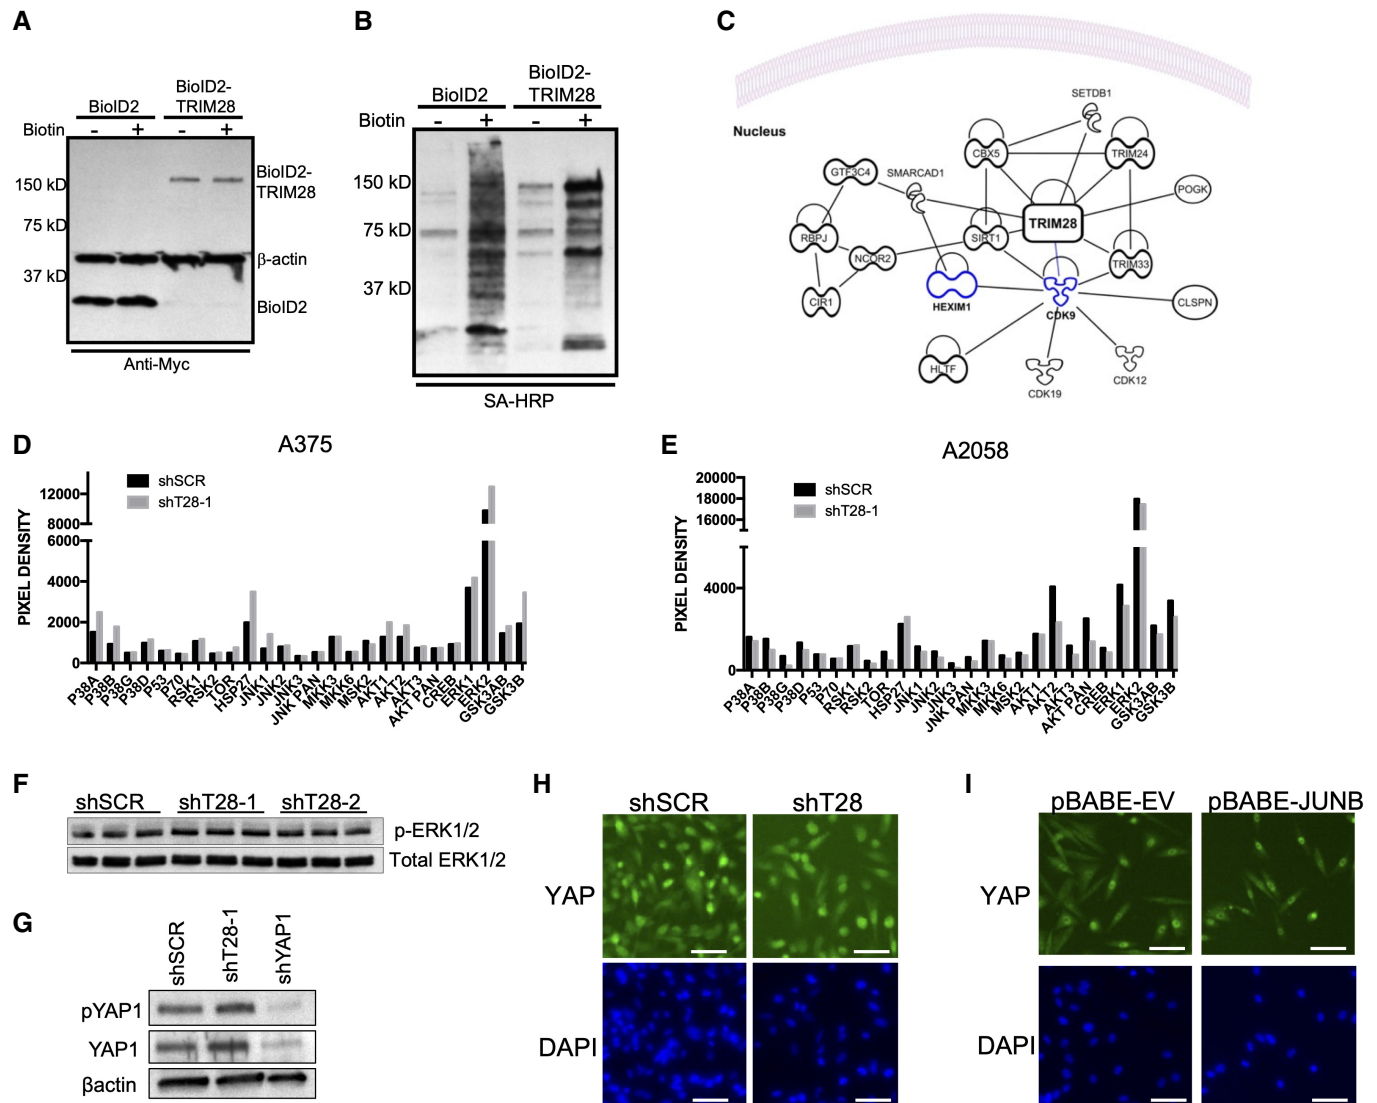

**Figure EV2. TRIM28 interacts with epigenetic regulators and factors regulating transcriptional elongation and does not directly affect ERK or YAP signaling.**

- A** A375 cells were transduced with pBABE-BioID2-TRIM28 or pBABE-BioID2 followed by selection with 1  $\mu$ g/ml puromycin. Expression of BioID2 and BioID2-TRIM28 in cell lysates was verified with immunoblotting using an anti-Myc antibody.
- B** A375 cells were transduced with pBABE-BioID2-TRIM28 or pBABE-BioID2. Transduced cells were then cultured in the presence of 50  $\mu$ M biotin for 20 h prior to lysis and then bound to Dynabeads MyOne Streptavidin C1 magnetic beads overnight. After the enrichment of biotinylated proteins, they were detected using streptavidin-HRP.
- C** Protein-protein interaction network based on identified TRIM28 interactors was analyzed by ingenuity pathway analysis (IPA). Displayed interactors are based on experimentally validated direct and indirect interactors. KRAB-ZFN proteins (> 50) are not displayed for increased clarity.
- D** A375 cells were transduced with shSCR or shT28-1 lentivirus followed by selection in a medium containing 1  $\mu$ g/ml puromycin cells. Cells were lysed and lysates were applied to Human Phospho-MAPK Antibody Array.
- E** A2058 cells were transduced with shSCR or shT28-1 lentivirus followed by selection in a medium containing 1  $\mu$ g/ml puromycin cells. Cells were lysed and lysates were applied to Human Phospho-MAPK Antibody Array.
- F** A375 cells were transduced with shSCR, shT28-1, or shYAP1 lentivirus. After selection, 1  $\mu$ g/ml puromycin cells were lysed and proteins were separated on 4–20% SDS-PAGE. Proteins were transferred to PVDF membranes and detected with anti-ERK1/2 and anti-phospho-ERK1/2.
- G** A375 cells were transduced with shSCR or shT28-1 lentivirus. After selection, 1  $\mu$ g/ml puromycin cells were lysed and proteins were separated on 4–20% SDS-PAGE. Proteins were transferred to PVDF membranes and detected with anti-phospho-YAP1 (pYAP1), anti-YAP1, or anti- $\beta$ -actin antibodies.
- H** Intracellular localization of YAP1 after TRIM28 knockdown in A375 cells. Scale bar is 60  $\mu$ m.
- I** Intracellular localization of YAP1 after JUNB overexpression in A375 cells. The scale bar is 60  $\mu$ m.

Source data are available online for this figure.

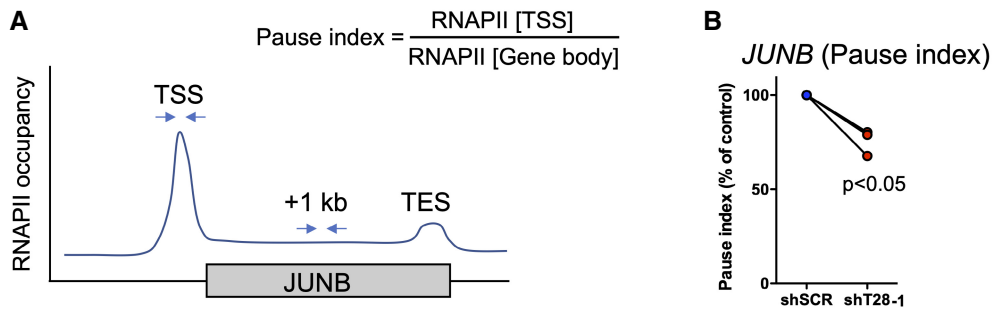

**Figure EV3. ChIP-qPCR validation of reduced RNAPII pausing at the TSS of the JUNB gene.**

- A A375 cells were transduced with shSCR or shT28-1 lentivirus followed by selection in 1  $\mu\text{g/ml}$  puromycin. After ChIP against RNAPII, qPCR was performed with primers amplifying precipitated genomic DNA from the TSS and gene body of JUNB (+1 kb).
- B Results were normalized to corresponding input samples and three biological replicates are displayed as % pause index compared to shSCR control. The ratio *t*-test was used for statistical testing ( $n = 3$ ).

**Figure EV4. RNA-seq of A375 cells overexpressing JUNB or FOSL1.**

- A PCA plot of the different samples in the RNA-seq experiment (EV = empty vector;  $n = 4$ ).
- B Volcano plot comparing A375 cells overexpressing JUNB against A375 cells overexpressing FOSL1.
- C Volcano plot comparing A375 cells overexpressing FOSL1 against A375 cells transduced with EV.
- D Immunoblotting against FOSL1 after overexpression with pBABE-FOSL1 in A375 cells. HSP90 was used as a loading control.
- E GSEA analysis of A375 cells overexpressing JUNB compared to cells overexpressing FOSL1 ( $n = 4$ ).
- F Validation of JUNB overexpression effect on YAP1 target genes *ANKRD1*, *CTGF*, *CYR61*, as well as *CXCL8* and *CXCL2* in A2058 cells. qRT-PCR was used to determine expression levels and results are expressed as mean  $\pm$  SEM from three biological replicates ( $n = 3$ ). Two-sided unpaired *t*-tests were used for statistical testing.
- G Rescue experiment to determine the expression of typical YAP1 and RAS signature genes after siRNA (siNTC or siJUNB) transfection of A375 cells transduced with shSCR or shT28-1. qRT-PCR was used to determine expression levels relative to *UBC*, and the results are expressed as mean  $\pm$  SEM from three biological replicates ( $n = 3$ ). Two-sided unpaired *t*-tests were used for statistical testing.
- H A375 cell lysate was used for immunoprecipitation of endogenous JUNB followed by detection by immunoblotting using anti-YAP1, anti-pan-TEAD, and anti-FOSL1. An isotype IgG antibody was used as a negative immunoprecipitation control.

Data information: *P*-values in (F and G): \* $P < 0.05$ , \*\* $P < 0.01$ , \*\*\* $P < 0.001$ .  
Source data are available online for this figure.

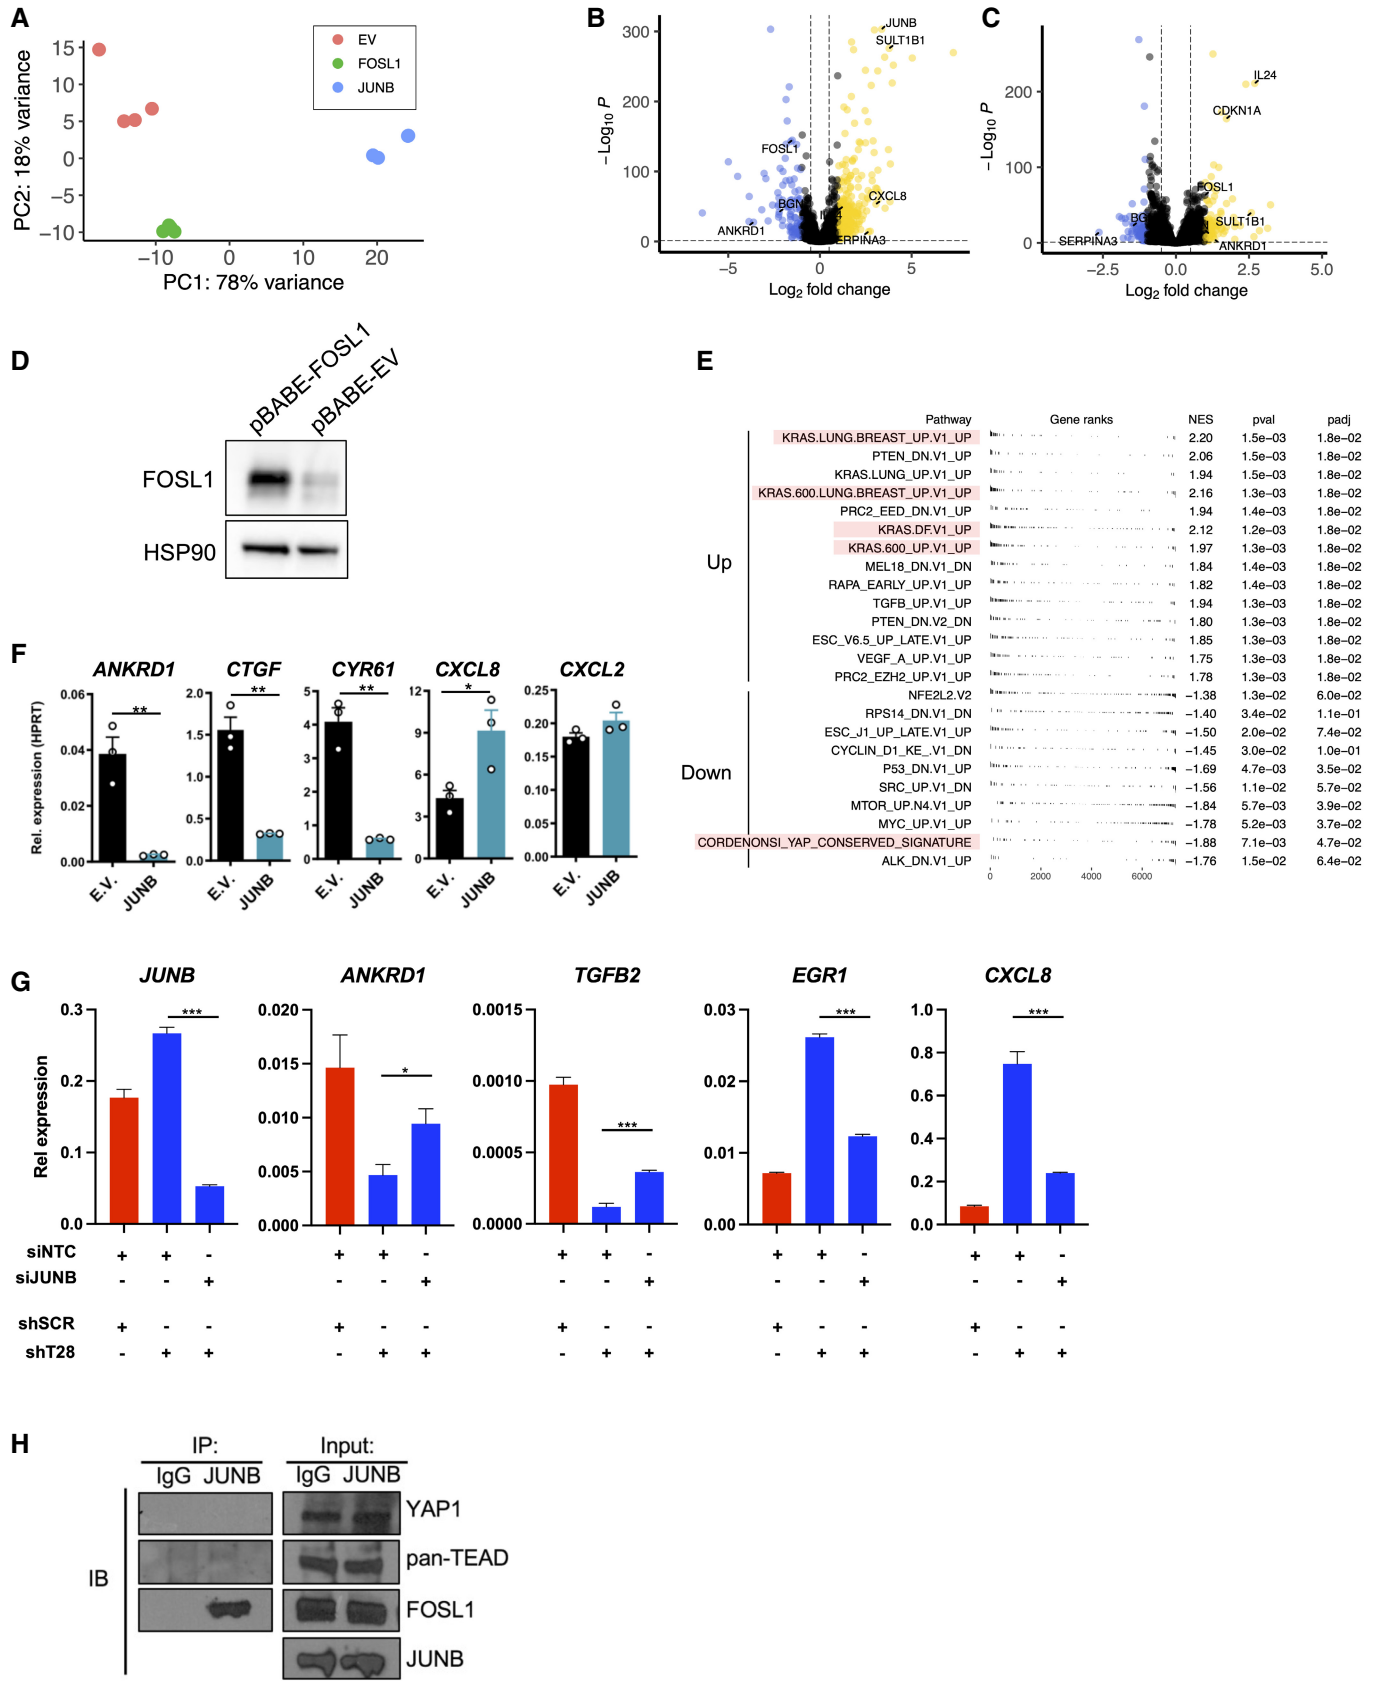

Figure EV4.

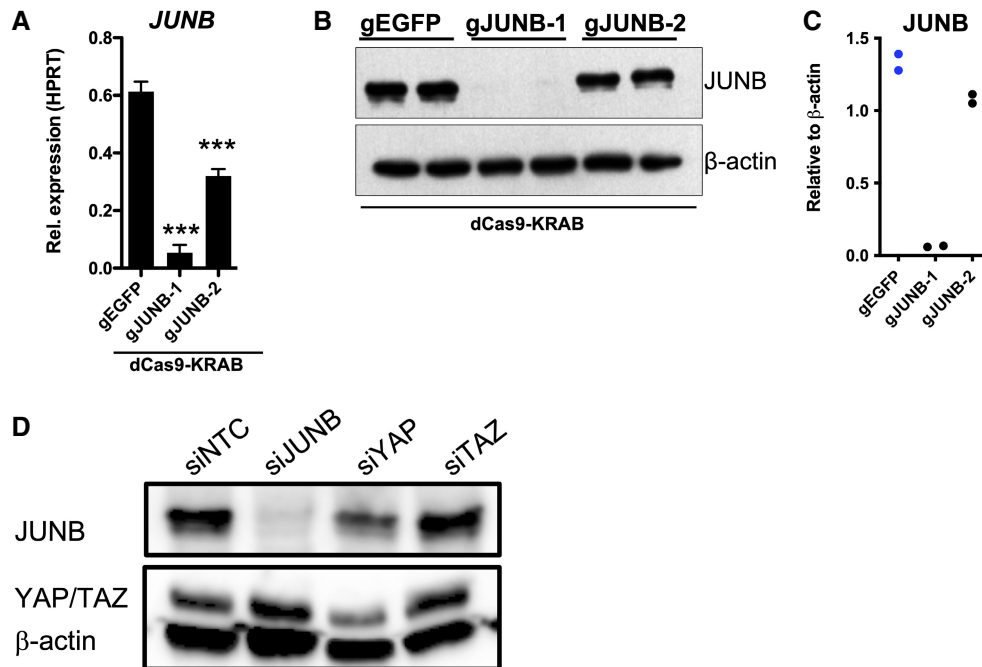

**Figure EV5. Validation of JUNB, YAP, and TAZ expression after CRISPRi and siRNA.**

- A Expression of *JUNB* in A375 cells after transduction with dCas9-KRAB lentiviruses expressing gRNA targeting *JUNB* (gJUNB-1 or gJUNB-2) or a control gRNA (gEGFP). qRT-PCR was used to determine *JUNB* expression levels, and the results are expressed as mean  $\pm$  SEM from three biological replicates ( $n = 3$ ). One-way ANOVA and Dunnett's *post hoc* test were used for statistical testing. \* $P < 0.05$ , \*\* $P < 0.01$ , \*\*\* $P < 0.001$ .
- B Expression of *JUNB* in A375 cells after transduction with dCas9-KRAB lentiviruses expressing gRNA targeting *JUNB* (gJUNB-1 or gJUNB-2) or a control gRNA (gEGFP). Immunoblotting was used to determine the protein levels of *JUNB*.  $\beta$ -actin was used as loading control.
- C Validation of *JUNB* knockdown (shown in B) by densitometry. *JUNB* levels are shown relative to  $\beta$ -actin.
- D Validation of siNTC-, siJUNB-, siYAP1-, and siTAZ-mediated knockdown in A375 cells.

Source data are available online for this figure.
