# Supplementary material for: The bromodomain protein TRIM28 controls the balance between growth and invasiveness in melanoma
Source: PubMed Central journal article supplement (PMC9827549; doi:10.15252/embr.202254944), 2022-11-07
Supplement: EMBR-24-e54944-s004.pdf [file EMBR-24-e54944-s004.pdf]

**Fig. 4A**

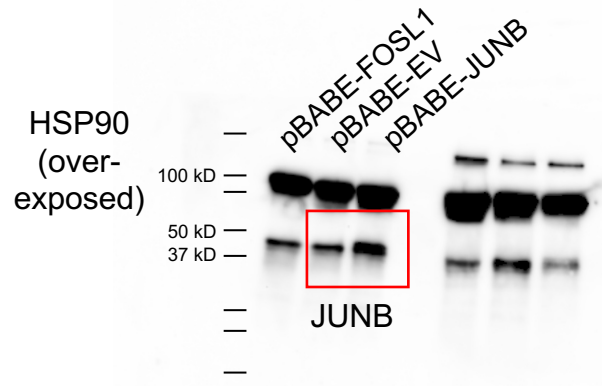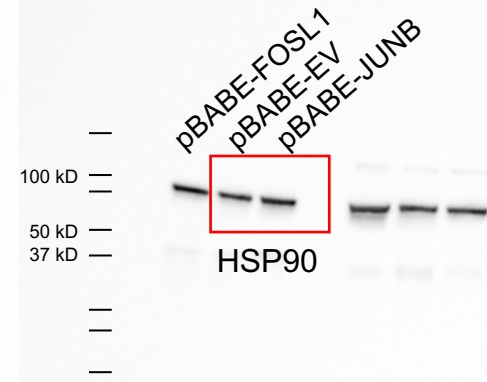

Size marker = Precision Plus Protein Dual Color (Bio-Rad)
